# Supplementary material for: Nuclear Herpesvirus Capsid Motility Is Not Dependent on F-Actin
Source: PubMed Central journal article supplement — mBio. 2014 Oct 7;5(5):e01909-14. doi: 10.1128/mBio.01909-14 (PMC4196236; doi:10.1128/mbio.01909-14), 2014-10-07
Supplement: mbo005142020sf1.pdf [file mbo005142020sf1.pdf]

# Figure S1

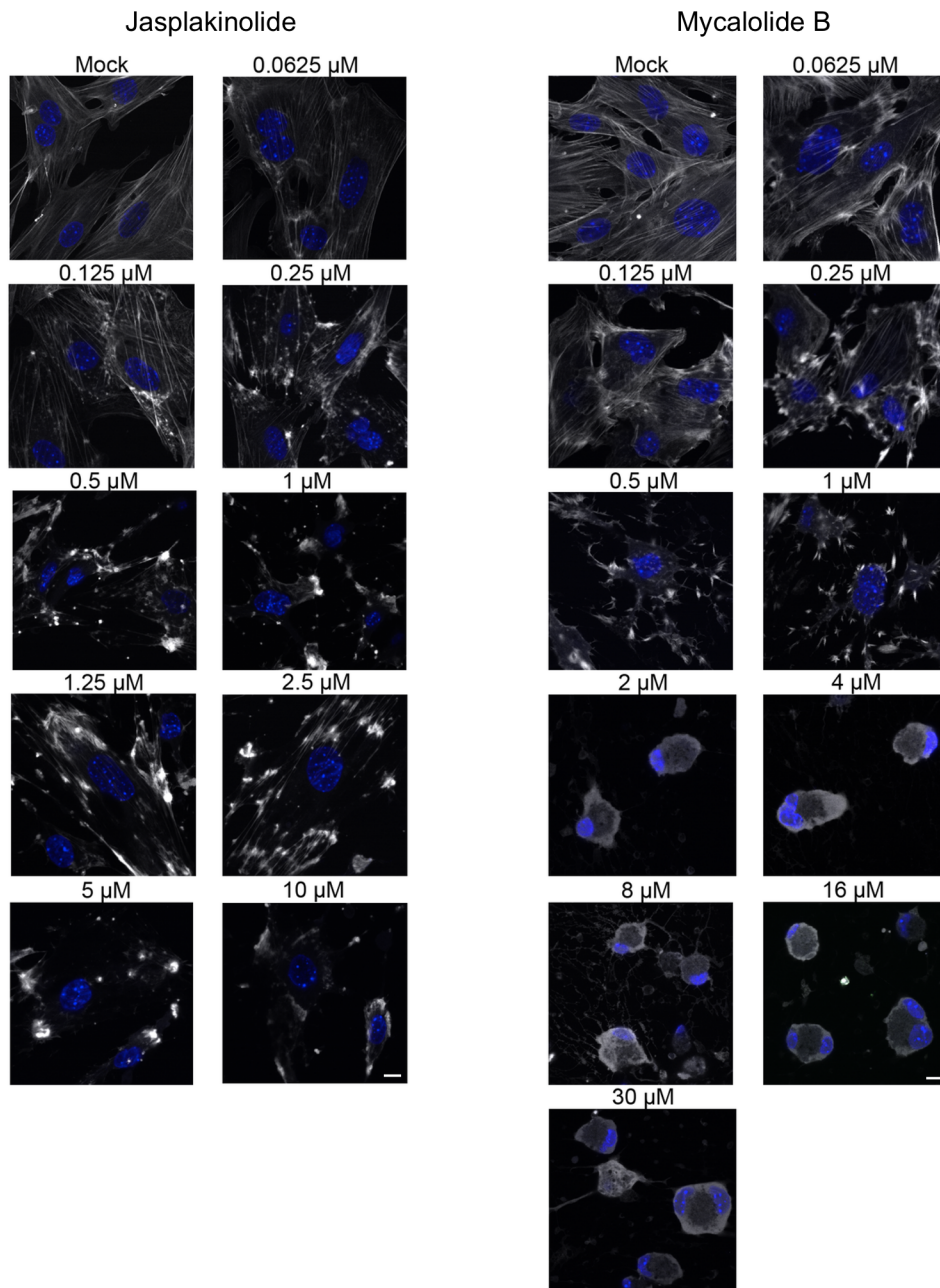

**Figure S1: Effect of varying concentrations of Jasplakinolide and Mycalolide-B on F-actin**

MEF cells constitutively expressing Lifeact-EGFP (white) were treated with varying concentrations of Jasplakinolide and Mycalolide-B for 1h, fixed, counterstained with DAPI (blue) and imaged by confocal laser scanning microscopy in one confocal section. Scale bars indicate 10  $\mu\text{m}$ .
