# Supplementary material for: Nuclear Herpesvirus Capsid Motility Is Not Dependent on F-Actin
Source: PubMed Central journal article supplement — mBio. 2014 Oct 7;5(5):e01909-14. doi: 10.1128/mBio.01909-14 (PMC4196236; doi:10.1128/mbio.01909-14), 2014-10-07
Supplement: mbo005142020sf2.pdf [file mbo005142020sf2.pdf]

# Figure S2

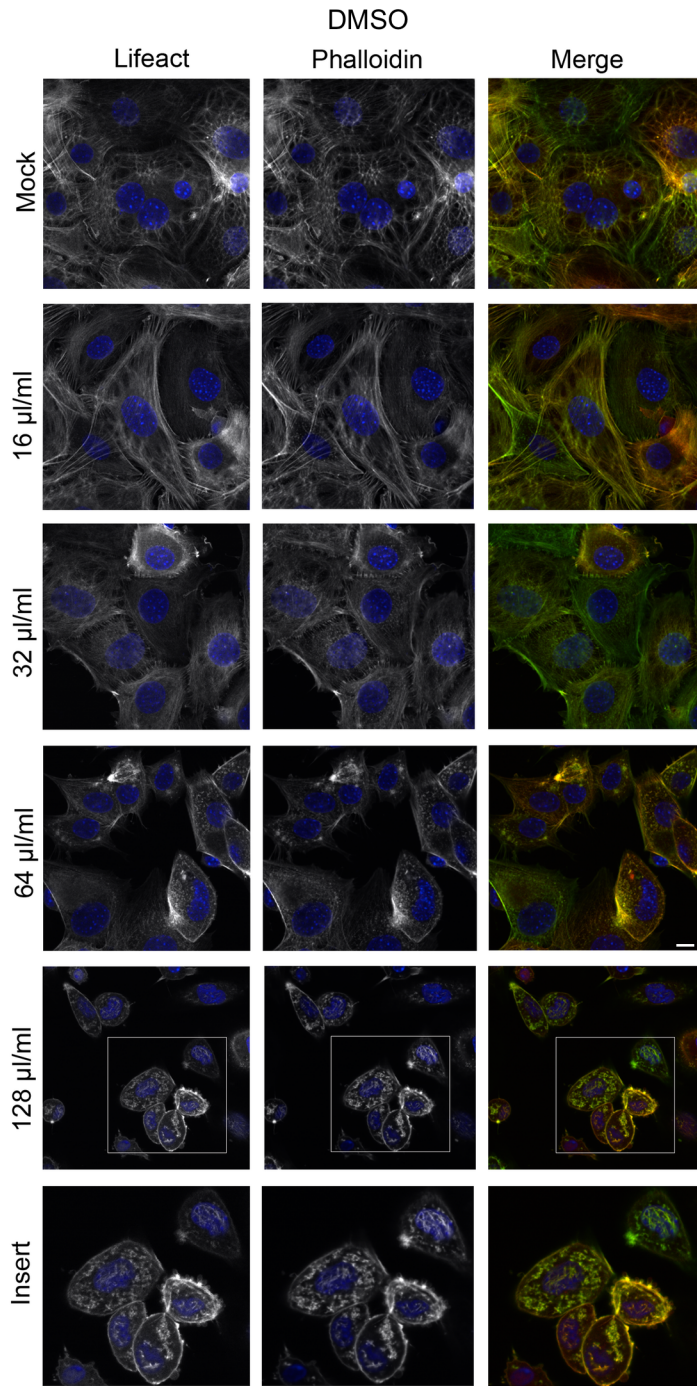

**Figure S2: Effect of varying concentrations of DMSO on F-actin**

MEF cells constitutively expressing Lifeact-EGFP (white) were treated with varying concentrations of DMSO for 1h, fixed, counterstained with DAPI (blue) and imaged by confocal laser scanning microscopy in one confocal section. Scale bar indicates 10  $\mu\text{m}$ .
