# Supplementary material for: Nuclear Herpesvirus Capsid Motility Is Not Dependent on F-Actin
Source: PubMed Central journal article supplement — mBio. 2014 Oct 7;5(5):e01909-14. doi: 10.1128/mBio.01909-14 (PMC4196236; doi:10.1128/mbio.01909-14), 2014-10-07
Supplement: mbo005142020sf4.pdf [file mbo005142020sf4.pdf]

A

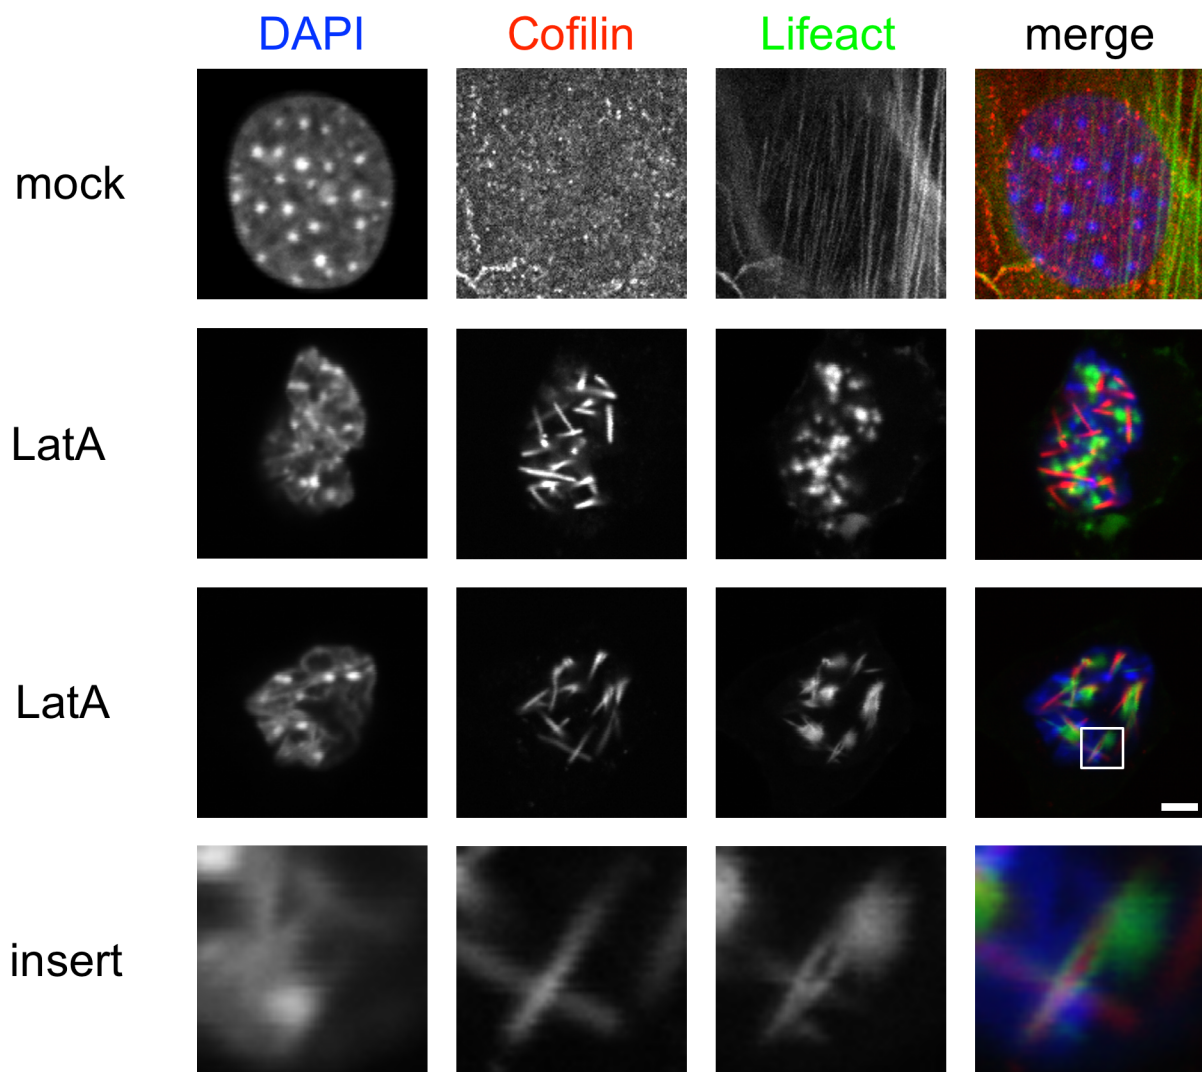

**Figure S4: Two different kinds of actin rods are induced by LatA**

MEF cells constitutively expressing Lifect-EGFP were mock treated or incubated for 1 h with  $4.7 \mu\text{M}$  ( $2 \mu\text{g/ml}$ ) LatA, fixed with PFA and then extracted with ice-cold Methanol. Afterwards cells were stained with a polyclonal antiserum directed against Cofilin and counterstained with DAPI. Images were acquired by laser scanning confocal microscopy in one confocal section. The scale bar indicates  $5 \mu\text{m}$ .
