# Supplementary material for: Nuclear Herpesvirus Capsid Motility Is Not Dependent on F-Actin
Source: PubMed Central journal article supplement — mBio. 2014 Oct 7;5(5):e01909-14. doi: 10.1128/mBio.01909-14 (PMC4196236; doi:10.1128/mbio.01909-14), 2014-10-07
Supplement: mbo005142020sf5.pdf [file mbo005142020sf5.pdf]

# Figure S5

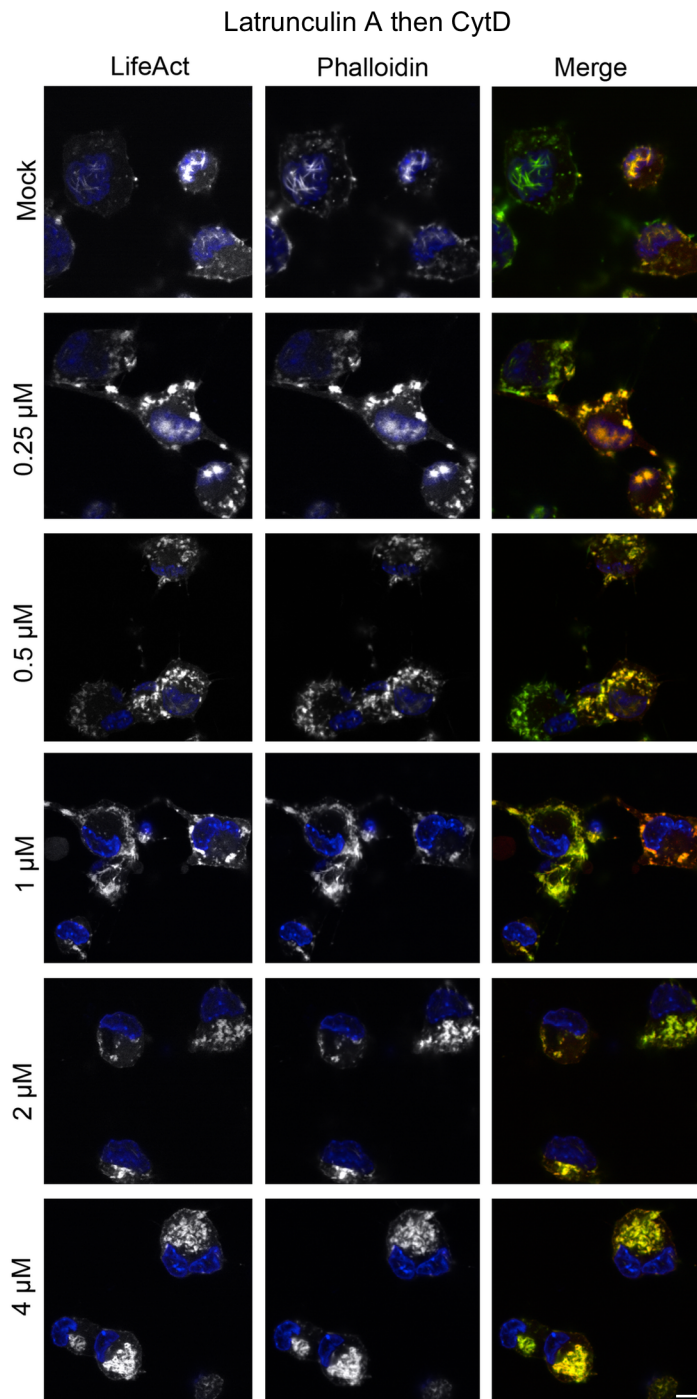

**Figure S5: Cytochalasin D can revert actin rod formation by LatA**

MEF cells constitutively expressing Lifeact-EGFP (white) were treated with 4.7  $\mu$ M (2  $\mu$ g/ml) Latrunculin A for 1 h. Then varying concentrations of Cytochalasin D were added for 1h and cells were fixed, counterstained with DAPI (blue) and imaged by confocal laser scanning microscopy in one confocal section. The scale bar indicates 10  $\mu$ m.
