# Supplementary material for: Nuclear Herpesvirus Capsid Motility Is Not Dependent on F-Actin
Source: PubMed Central journal article supplement — mBio. 2014 Oct 7;5(5):e01909-14. doi: 10.1128/mBio.01909-14 (PMC4196236; doi:10.1128/mbio.01909-14), 2014-10-07
Supplement: mbo005142020sf6.pdf [file mbo005142020sf6.pdf]

# Figure S6

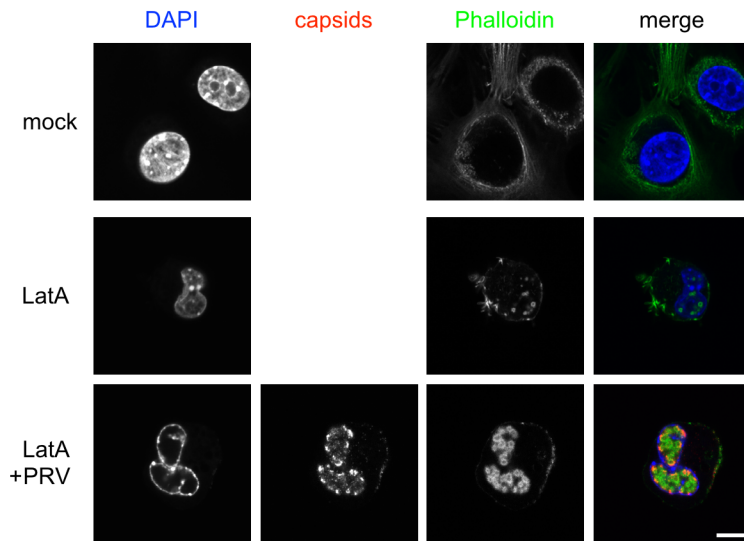

**Figure S6: LatA induces actin rods in NIH/3T3 cells**

NIH/3T3 cells were mock infected or infected with PRV mRFP-VP26. 4 hpi cells were incubated for 1 h with 4.7  $\mu$ M LatA. Cells were then fixed and stained with fluorescently labeled Phalloidin as well as DAPI and imaged by confocal laser scanning microscopy in one confocal section. Scale bar indicates 10  $\mu$ m.
